# Supplementary material
Source: MDPI journal article supplement (https://www.mdpi.com/2073-4352/10/5/401)
Supplement: s1 [file s1]

## Electronic Supporting Information

### Effect of Cholesterol and Ibuprofen on DMPC- $\beta$ -Aescin Bicelles: A Temperature-Dependent Wide-Angle X-ray Scattering Study.

Ramsia Geisler <sup>1,2,\*</sup>, Sylvain Prévost <sup>3,4</sup>, Rajeev Dattani <sup>3</sup>, and Thomas Hellweg <sup>1</sup>

<sup>1</sup> Physical and Biophysical Chemistry, Bielefeld University, 33615 Bielefeld, Germany;

<sup>2</sup> Soft Matter at Interfaces, Technical University of Darmstadt, 64289 Darmstadt, Germany

<sup>3</sup> ESRF-The European Synchrotron, 38043 Grenoble Cedex 9, France

<sup>4</sup> Institut Laue-Langevin, DS/LSS, 38042 Grenoble Cedex 9, France

\* Correspondence: ramsia@geisler.digital; Tel.: +49(0)651-16-24501

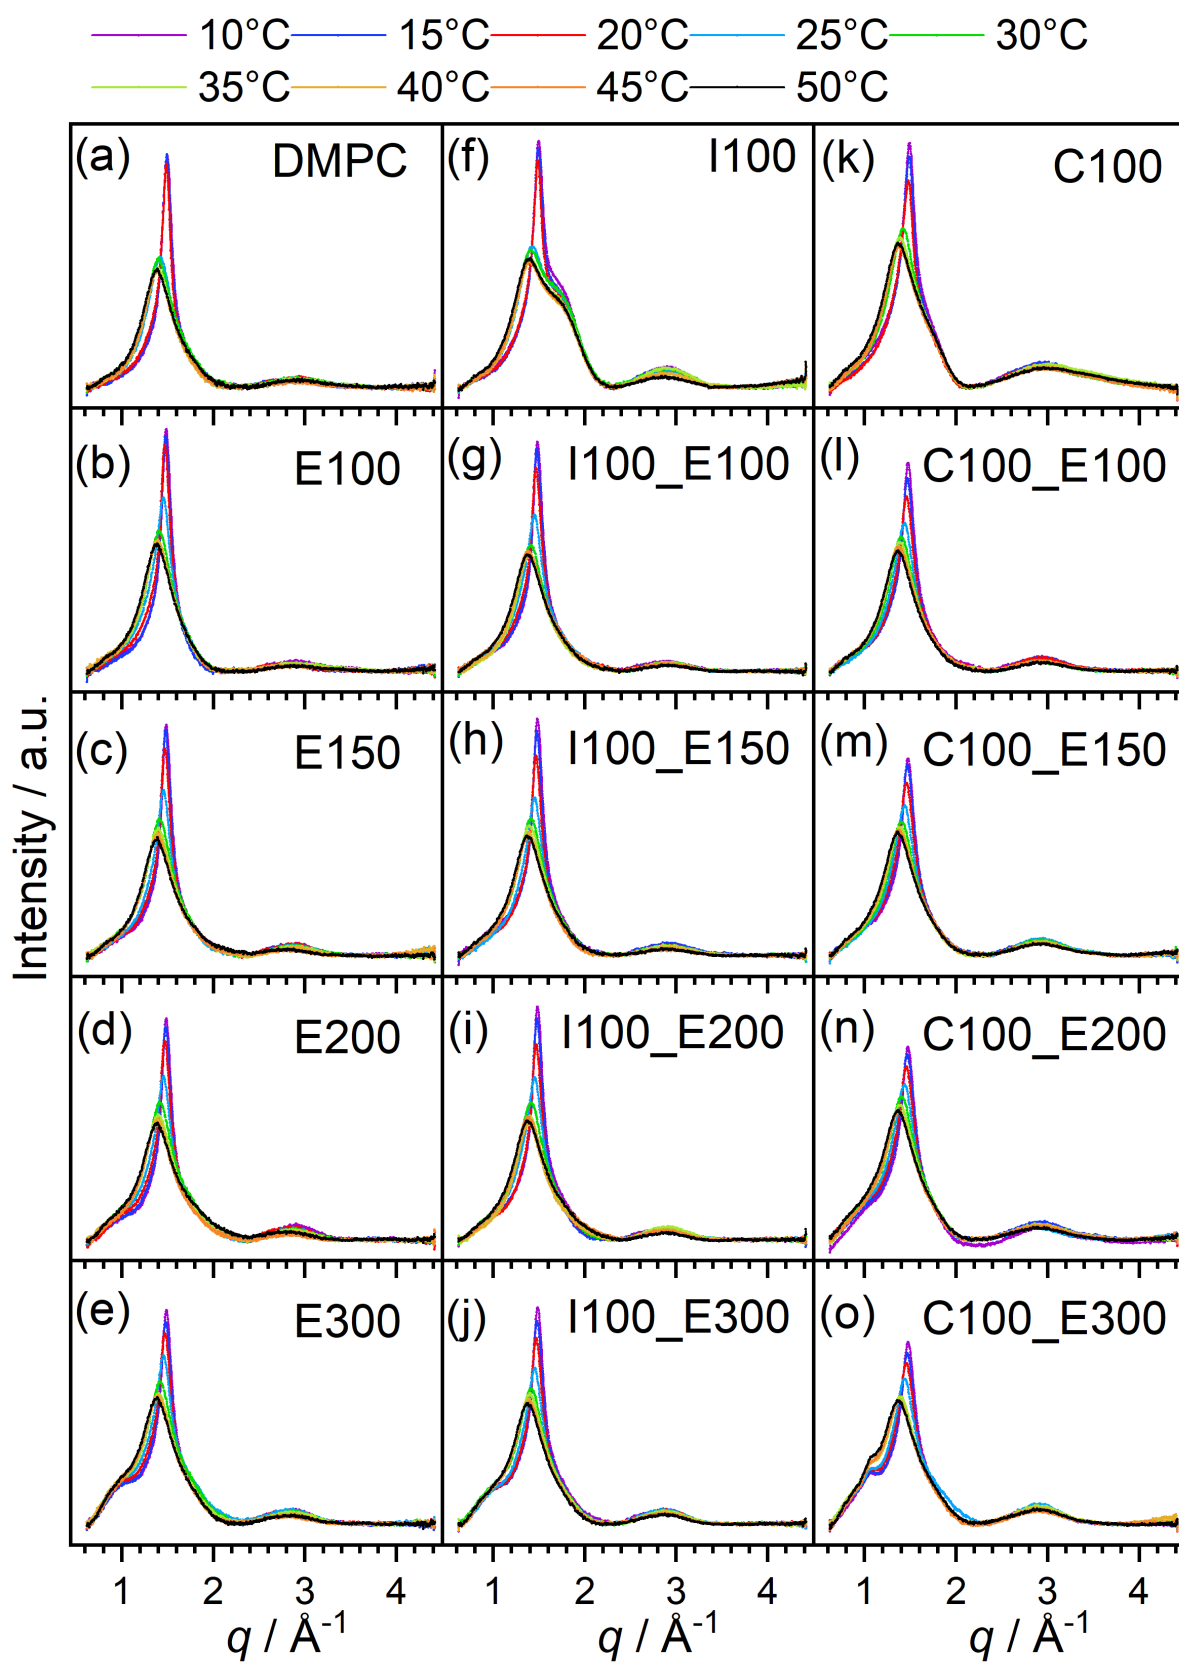

**Figure S1:** Full WAXS Spectra.

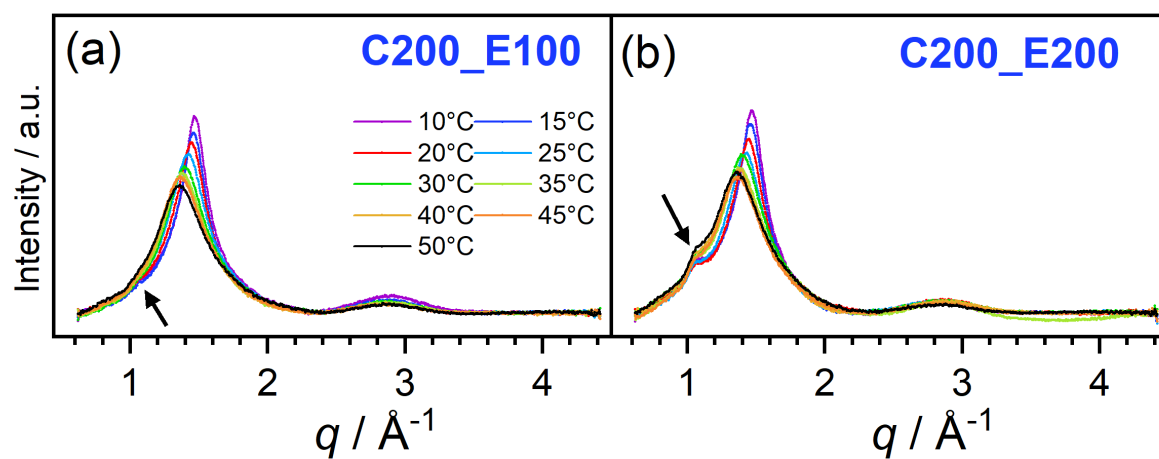

**Figure S2:** Full WAXS Spectra with 20 mol% cholesterol and 10 and 20mol%  $\beta$ -aescin.

## Determination of $T_m(\text{WAXS})$ from $d_{\text{WAXS}}$

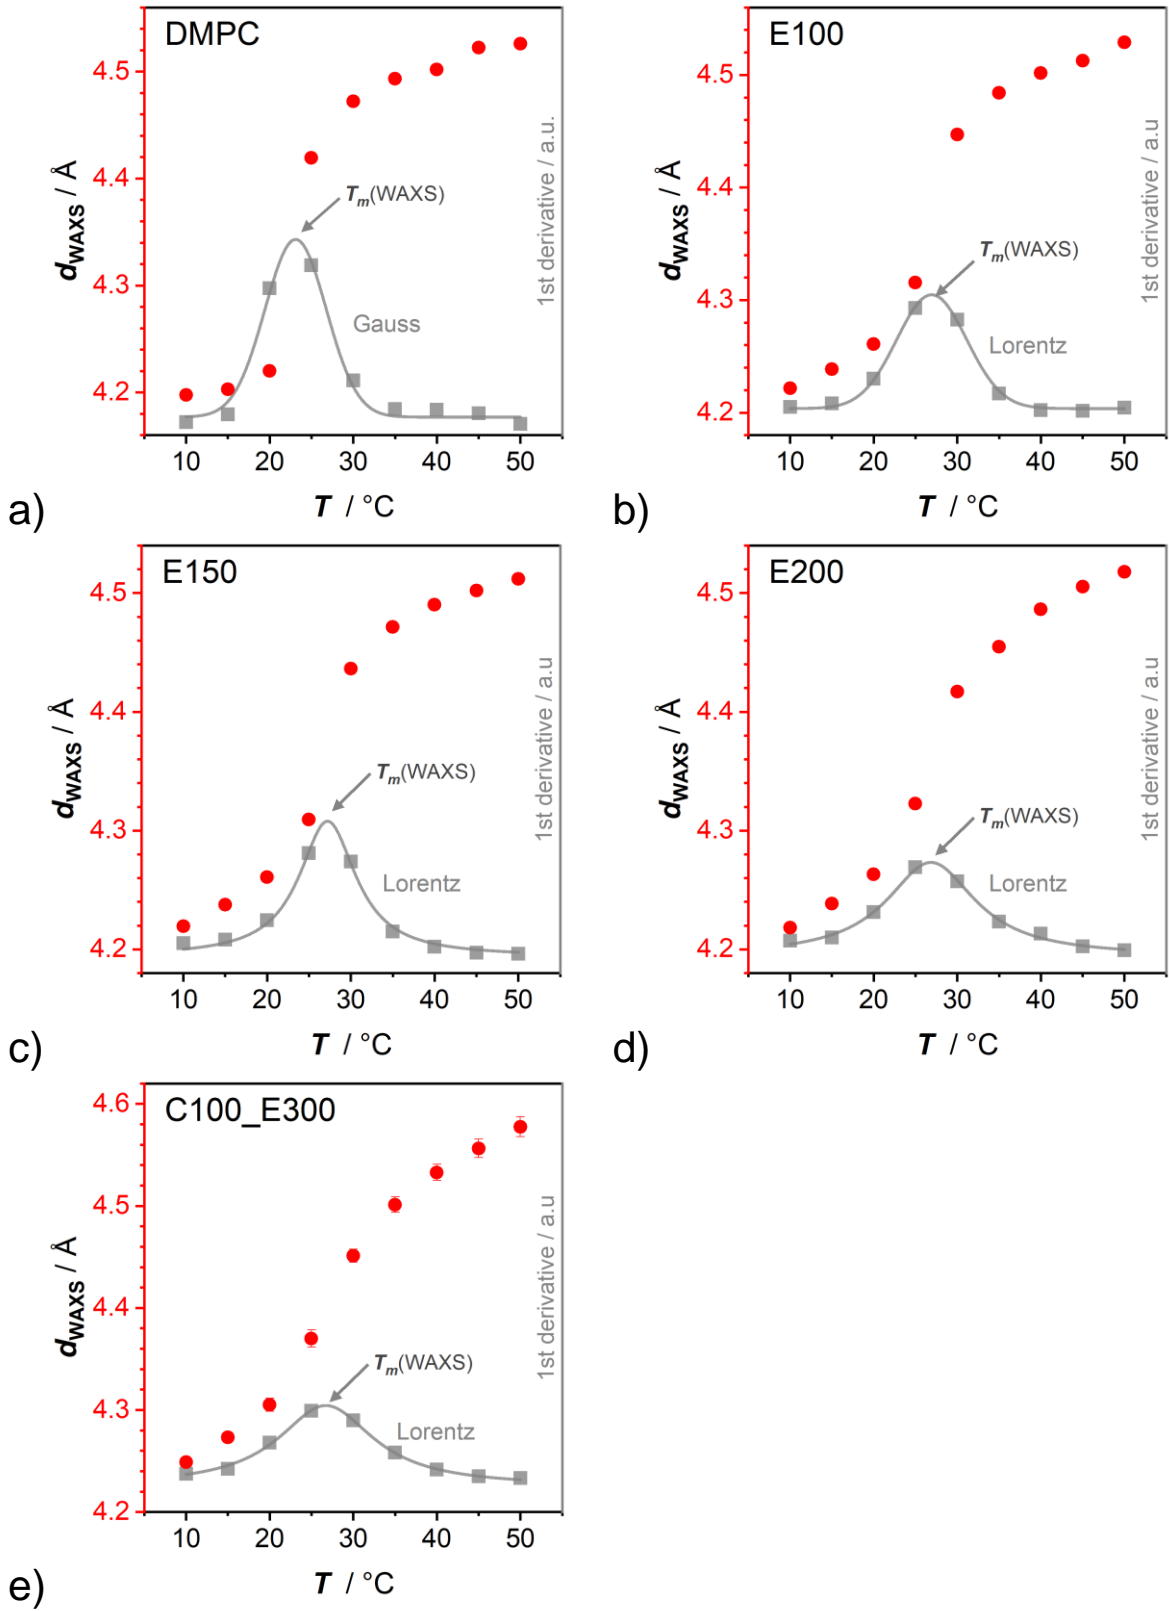

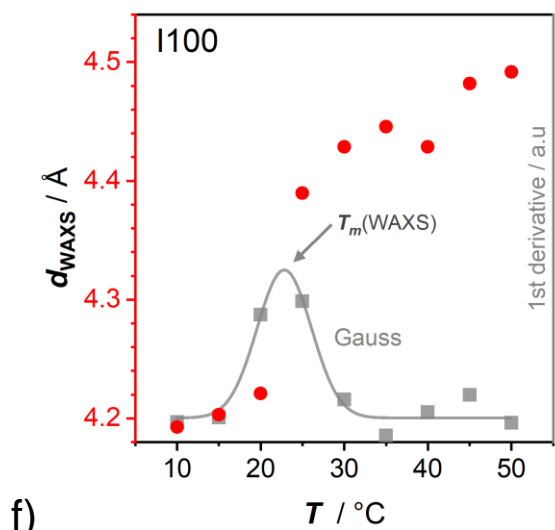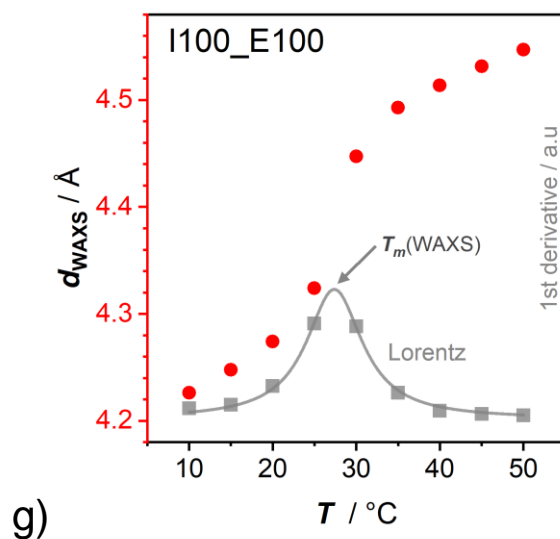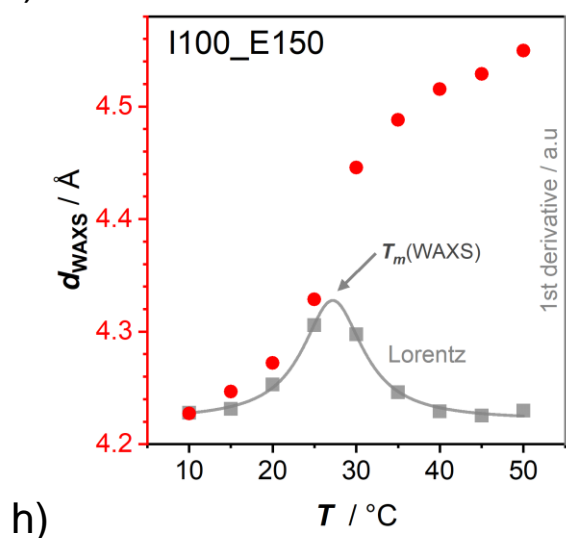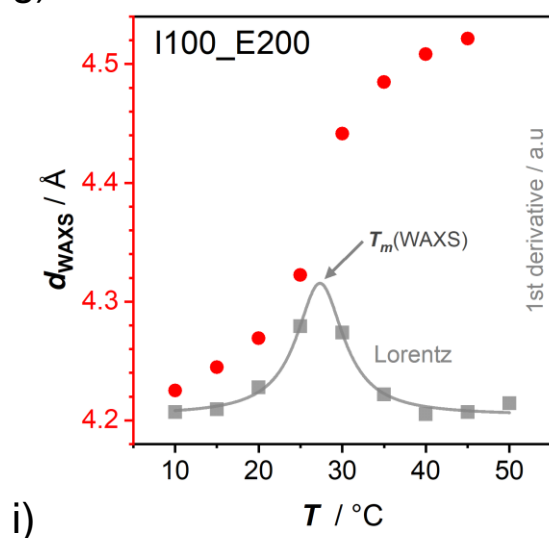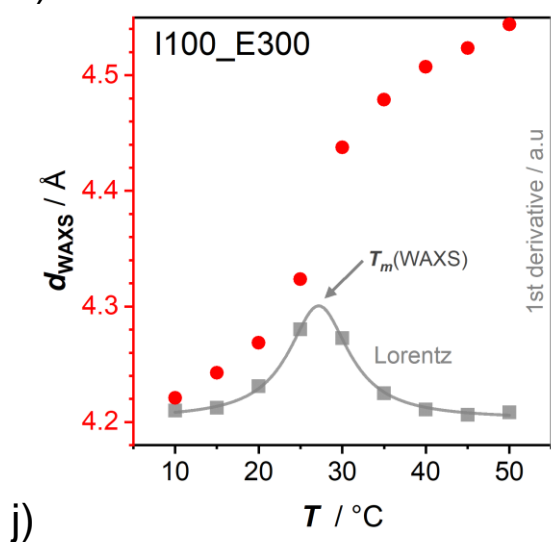

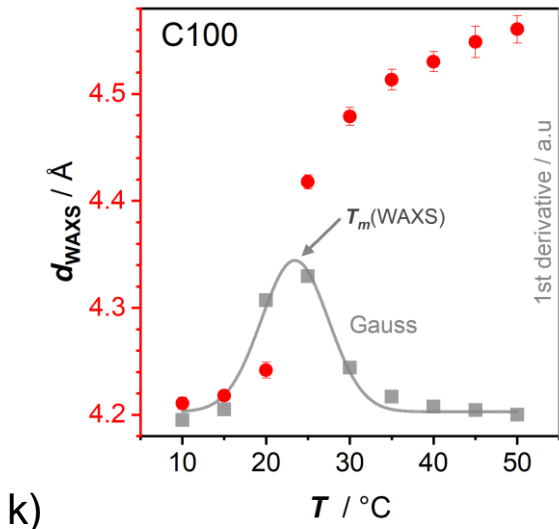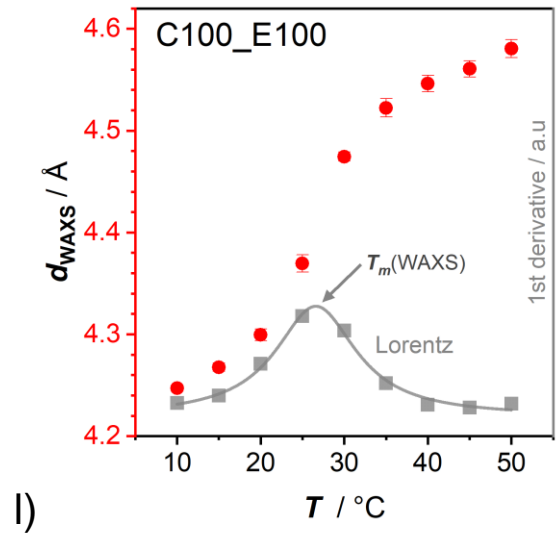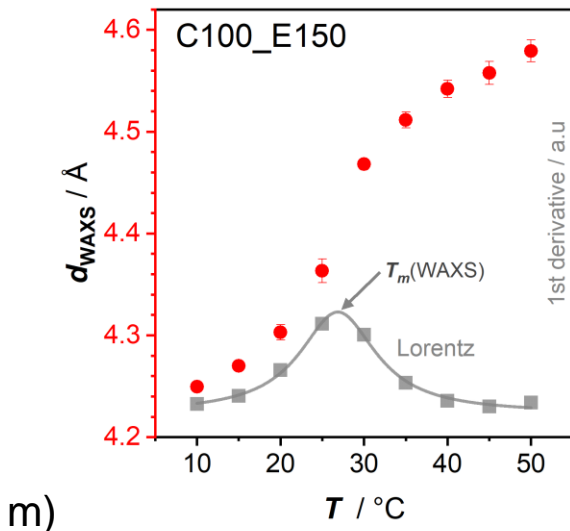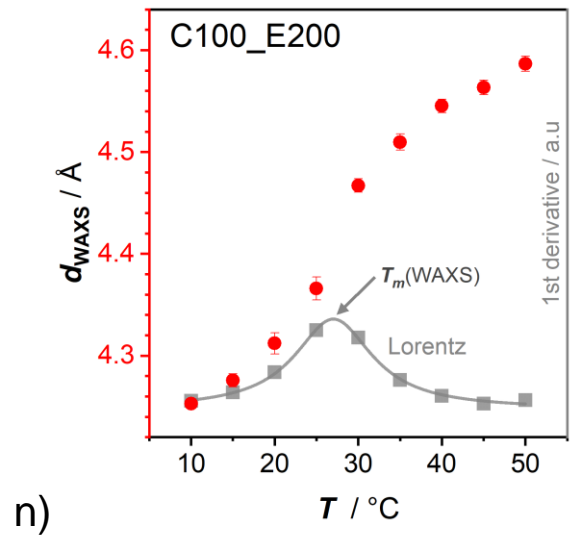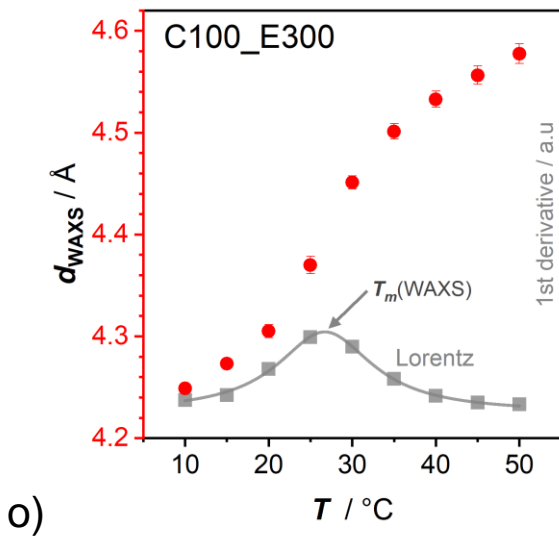

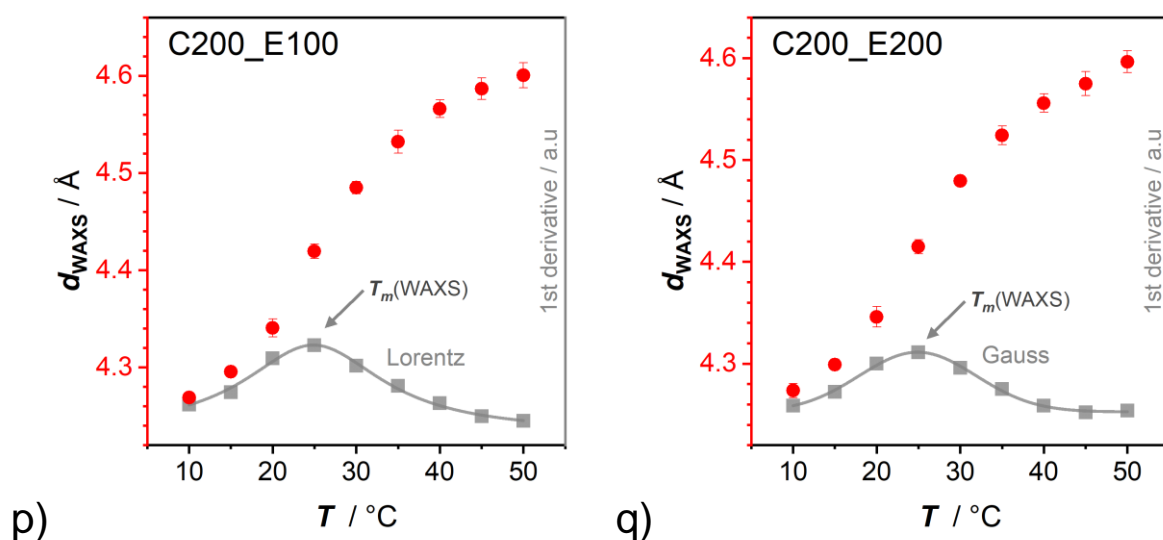

**Figure S3:** Determination of  $T_m(\text{WAXS})$  from  $d_{\text{WAXS}}$ . For this, the 1<sup>st</sup> order derivative was determined from  $d_{\text{WAXS}}$  values (gray symbols) and fitted with a peak function (Gauss or Lorentz) in order to determine the peak maximum. This value was eventually compared to  $y(0)$ -value from the 2<sup>nd</sup> order derivative. In this approach, we assume that  $T_m$  corresponds to the inflection point of the temperature-driven distance increase between acyl chains following approximately a sigmoidal shape.

**Table S1:** Summary of full width half maximum (FWHM)  $w(T)$  values of peak fits presented in Figure 7.

| $x(\text{aescin})$<br>mol% | $w(T)$<br>Aescin | $w(T)$<br>I100 | $w(T)$<br>C100 | $w(T)$<br>C200 |
|----------------------------|------------------|----------------|----------------|----------------|
| 0                          | $7.3 \pm 0.6$    | $6.5 \pm 1.5$  | $8.0 \pm 0.8$  |                |
| 10                         | $9.9 \pm 0.4$    | $8.1 \pm 0.9$  | $11.8 \pm 1.4$ | $20.3 \pm 2.0$ |
| 15                         | $8.3 \pm 1.2$    | $8.8 \pm 1.0$  | $11.2 \pm 1.1$ |                |
| 20                         | $13.0 \pm 1.7$   | $6.8 \pm 1.9$  | $11.3 \pm 0.9$ | $14.0 \pm 0.5$ |
| 30                         | $10.6 \pm 0.9$   | $8.8 \pm 0.8$  | $13.9 \pm 0.9$ |                |
